# Supplementary material for: Effect of interleukin (IL)-35 on IL-17 expression and production by human CD4+ T cells
Source: PeerJ. 2017 Feb 15;5:e2999. doi: 10.7717/peerj.2999 (PMC5314955; doi:10.7717/peerj.2999)
Supplement: Raw DataS1 [file peerj-05-2999-s001.xlsx]

## Sheet: Fig1
		Healthy Volunteer	1	2	3
		IL-17A+CD4+ T cells （%）	3.96	2.57	6.92
		IFN-γ+CD4+ T cells （%）	10.93	23.52	34.09
		Foxp3+CD4+ T cells (%)	8.36	11.06	8.66
		Patient with CP	1	2	3
		IL-17A+CD4+ T cells (%)	4	12.03	7.18
		IFN-γ+CD4+ T cells (%)	21.17	17.62	24.98
		Foxp3+CD4+ T cells (%)	10.24	24.98	8.54
		Figure1 is representative dot plots (healthy volunteer 2 and patient with CP 3)

## Sheet: Fig2
	donor1			donor2			donor3
	Sample Name	Cq		Sample Name	Cq		Sample Name	Cq
	Actb_Th0	19.3846		Actb_Th0	19.4946		Actb_Th0	18.4784
	Actb_Th0	19.4623		Actb_Th0	19.3597		Actb_Th0	18.5044
	Actb_Th0	19.4936		Actb_Th0	19.4155		Actb_Th0	18.2044
	Actb_Th17_cocktail	19.8135		Actb_Th17_cocktail	19.6438		Actb_Th17_cocktail	19.2381
	Actb_Th17_cocktail	19.8909		Actb_Th17_cocktail	19.783		Actb_Th17_cocktail	19.0671
	Actb_Th17_cocktail	19.7851		Actb_Th17_cocktail	19.9278		Actb_Th17_cocktail	19.2477
	Actb_Th17_IL-23	18.9997		Actb_Th17_IL-23	19.7343		Actb_Th17_IL-23	18.9878
	Actb_Th17_IL-23	18.933		Actb_Th17_IL-23	19.9845		Actb_Th17_IL-23	18.8473
	Actb_Th17_IL-23	18.9966		Actb_Th17_IL-23	19.7408		Actb_Th17_IL-23	18.9813
	RORA_Th0	27.844		RORA_Th0	27.9325		RORA_Th0	27.5425
	RORA_Th0	27.8452		RORA_Th0	27.9066		RORA_Th0	27.4781
	RORA_Th0	27.7864		RORA_Th0	27.882		RORA_Th0	27.3704
	RORA_Th17_cocktail	26.9265		RORA_Th17_cocktail	26.809		RORA_Th17_cocktail	26.7583
	RORA_Th17_cocktail	26.9524		RORA_Th17_cocktail	26.8132		RORA_Th17_cocktail	26.7398
	RORA_Th17_cocktail	26.8497		RORA_Th17_cocktail	26.7955		RORA_Th17_cocktail	26.7973
	RORA_Th17_IL-23	27.2615		RORA_Th17_IL-23	27.5559		RORA_Th17_IL-23	27.4128
	RORA_Th17_IL-23	27.2285		RORA_Th17_IL-23	27.5694		RORA_Th17_IL-23	27.4505
	RORA_Th17_IL-23	27.2484		RORA_Th17_IL-23	27.4662		RORA_Th17_IL-23	27.4325
	RORC_Th0	30.7423		RORC_Th0	30.0104		RORC_Th0	30.8096
	RORC_Th0	30.7457		RORC_Th0	30.0592		RORC_Th0	30.8496
	RORC_Th0	30.7792		RORC_Th0	30.006		RORC_Th0	30.8256
	RORC_Th17_cocktail	30.8457		RORC_Th17_cocktail	29.8009		RORC_Th17_cocktail	31.2846
	RORC_Th17_cocktail	30.8052		RORC_Th17_cocktail	29.8664		RORC_Th17_cocktail	31.2681
	RORC_Th17_cocktail	30.7848		RORC_Th17_cocktail	29.8621		RORC_Th17_cocktail	31.2176
	RORC_Th17_IL-23	30.3442		RORC_Th17_IL-23	30.5383		RORC_Th17_IL-23	31.1621
	RORC_Th17_IL-23	30.3023		RORC_Th17_IL-23	30.5492		RORC_Th17_IL-23	31.1778
	RORC_Th17_IL-23	30.2958		RORC_Th17_IL-23	30.4873		RORC_Th17_IL-23	31.195

## Sheet: Fig3
	donor1			donor2			donor3
	Sample Name	Cq		Sample Name	Cq		Sample Name	Cq
	Actb_Th0	20.3146		Actb_Th0	20.8765		Actb_Th0	20.0867
	Actb_Th0	19.7711		Actb_Th0	20.4608		Actb_Th0	19.7565
	Actb_Th0	19.7619		Actb_Th0	20.2839		Actb_Th0	19.5796
	Actb_Th17	20.5237		Actb_Th17	20.4868		Actb_Th17	20.7397
	Actb_Th17	19.9646		Actb_Th17	19.9862		Actb_Th17	20.2585
	Actb_Th17	19.9223		Actb_Th17	19.9728		Actb_Th17	20.2956
	Actb_Th17_rIL-35	19.0254		Actb_Th17_rIL-35	19.3051		Actb_Th17_rIL-35	19.2368
	Actb_Th17_rIL-35	18.9122		Actb_Th17_rIL-35	19.3124		Actb_Th17_rIL-35	19.2554
	Actb_Th17_rIL-35	18.9987		Actb_Th17_rIL-35	19.2446		Actb_Th17_rIL-35	19.0742
	IL17_Th0	28.9505		IL17_Th0	30.8561		IL17_Th0	27.7024
	IL17_Th0	28.9778		IL17_Th0	30.8517		IL17_Th0	27.5829
	IL17_Th0	29.0281		IL17_Th0	30.9676		IL17_Th0	27.4287
	IL17_Th17	28.2147		IL17_Th17	28.5429		IL17_Th17	27.0453
	IL17_Th17	28.3528		IL17_Th17	28.5606		IL17_Th17	26.9313
	IL17_Th17	28.2698		IL17_Th17	28.5371		IL17_Th17	26.9592
	IL17_Th17_rIL-35	29.0325		IL17_Th17_rIL-35	28.175		IL17_Th17_rIL-35	26.5057
	IL17_Th17_rIL-35	29.0435		IL17_Th17_rIL-35	28.3487		IL17_Th17_rIL-35	26.5084
	IL17_Th17_rIL-35	29.0137		IL17_Th17_rIL-35	28.2079		IL17_Th17_rIL-35	26.5831
	RORA_Th0	26.3605		RORA_Th0	30.346		RORA_Th0	30.329
	RORA_Th0	26.3729		RORA_Th0	30.3397		RORA_Th0	30.2562
	RORA_Th0	26.2553		RORA_Th0	30.2699		RORA_Th0	30.2093
	RORA_Th17	25.8794		RORA_Th17	29.4799		RORA_Th17	29.9757
	RORA_Th17	25.7964		RORA_Th17	29.465		RORA_Th17	29.8551
	RORA_Th17	25.7868		RORA_Th17	29.4963		RORA_Th17	29.9418
	RORA_Th17_rIL-35	26.1862		RORA_Th17_rIL-35	29.1685		RORA_Th17_rIL-35	29.5073
	RORA_Th17_rIL-35	26.1623		RORA_Th17_rIL-35	29.2182		RORA_Th17_rIL-35	29.5617
	RORA_Th17_rIL-35	26.2776		RORA_Th17_rIL-35	29.1716		RORA_Th17_rIL-35	29.6159
	RORC_Th0	30.2259		RORC_Th0	28.46		RORC_Th0	30.5011
	RORC_Th0	30.2424		RORC_Th0	28.431		RORC_Th0	30.4911
	RORC_Th0	30.1947		RORC_Th0	28.386		RORC_Th0	30.563
	RORC_Th17	29.9217		RORC_Th17	27.2049		RORC_Th17	28.5637
	RORC_Th17	29.9681		RORC_Th17	27.1668		RORC_Th17	28.6362
	RORC_Th17	29.953		RORC_Th17	27.1691		RORC_Th17	28.571
	RORC_Th17_rIL-35	30.0348		RORC_Th17_rIL-35	26.7639		RORC_Th17_rIL-35	28.3813
	RORC_Th17_rIL-35	30.0246		RORC_Th17_rIL-35	26.7129		RORC_Th17_rIL-35	28.5528
	RORC_Th17_rIL-35	30.1023		RORC_Th17_rIL-35	26.8298		RORC_Th17_rIL-35	28.6391

## Sheet: Fig4
		donor1
			OD	Blank	OD-Blank		Dilution 10x
		Th0	0.102	0.064	0.038	6.50134	65.0134
			0.103		0.039	6.80847	68.0847
			0.113		0.049	9.87977	98.7977
		Th17	0.343		0.279	80.5197	805.197
			0.31		0.246	70.3844	703.844
			0.313		0.249	71.3058	713.058
		Th17_rIL-35	0.248		0.184	51.3423	513.423
			0.238		0.174	48.271	482.71
			0.245		0.181	50.4209	504.209
		donor2
			OD	Blank	OD-Blank		Dilution 10x
		Th0	0.107	0.064	0.043	8.03699	80.3699
			0.098		0.034	5.27282	52.7282
			0.109		0.045	8.65125	86.5125
		Th17	0.315		0.251	71.92	719.2
			0.295		0.231	65.7774	657.774
			0.298		0.234	66.6988	666.988
		Th17_rIL-35	0.262		0.198	55.6421	556.421
			0.264		0.2	56.2564	562.564
			0.276		0.212	59.942	599.42
		donor3
			OD	Blank	OD-Blank		Dilution 10x
		Th0	0.149	0.111	0.038	7.31594	73.1594
			0.152		0.041	7.70303	77.0303
			0.136		0.025	5.63855	56.3855
		Th17	0.437		0.326	44.4766	444.766
			0.452		0.341	46.412	464.12
			0.415		0.304	41.6379	416.379
		Th17_rIL-35	0.309		0.198	27.9607	279.607
			0.35		0.239	33.251	332.51
			0.297		0.186	26.4124	264.124
